# Supplementary material for: Stable cores and dynamic peripheries: spatial structuring dominates over temporal turnover in wastewater microbiomes across 16 Swedish cities
Source: Research Square preprint supplement (doi:10.21203/rs.3.rs-7987707/v1), 2025-12-08
Supplement: Supplementary file 1 [file 37b463e8cb4d4786021bf3f7.pdf]

## Supplementary Information

for the article: Stable cores and dynamic peripheries: spatial structuring dominates over temporal turnover in wastewater microbiomes across 16 Swedish cities. Mukhedkar D, et al.

Note: This file contains Supplementary Figures S1–S2 and Supplementary Table S1 associated with the main text. Supplementary Tables S2–S4 are provided as separate additional files in CSV format due to their large size.

### Table of Contents

- Supplementary Figure S1 – Geographic distance–decay p. 2
- Supplementary Figure S2 – Stable-core abundance by city p. 3
- Supplementary Table S1 – Within-city turnover decomposition p. 3

Supplementary Figure S1: Geographic distance–decay of wastewater microbiomes at two timepoints.

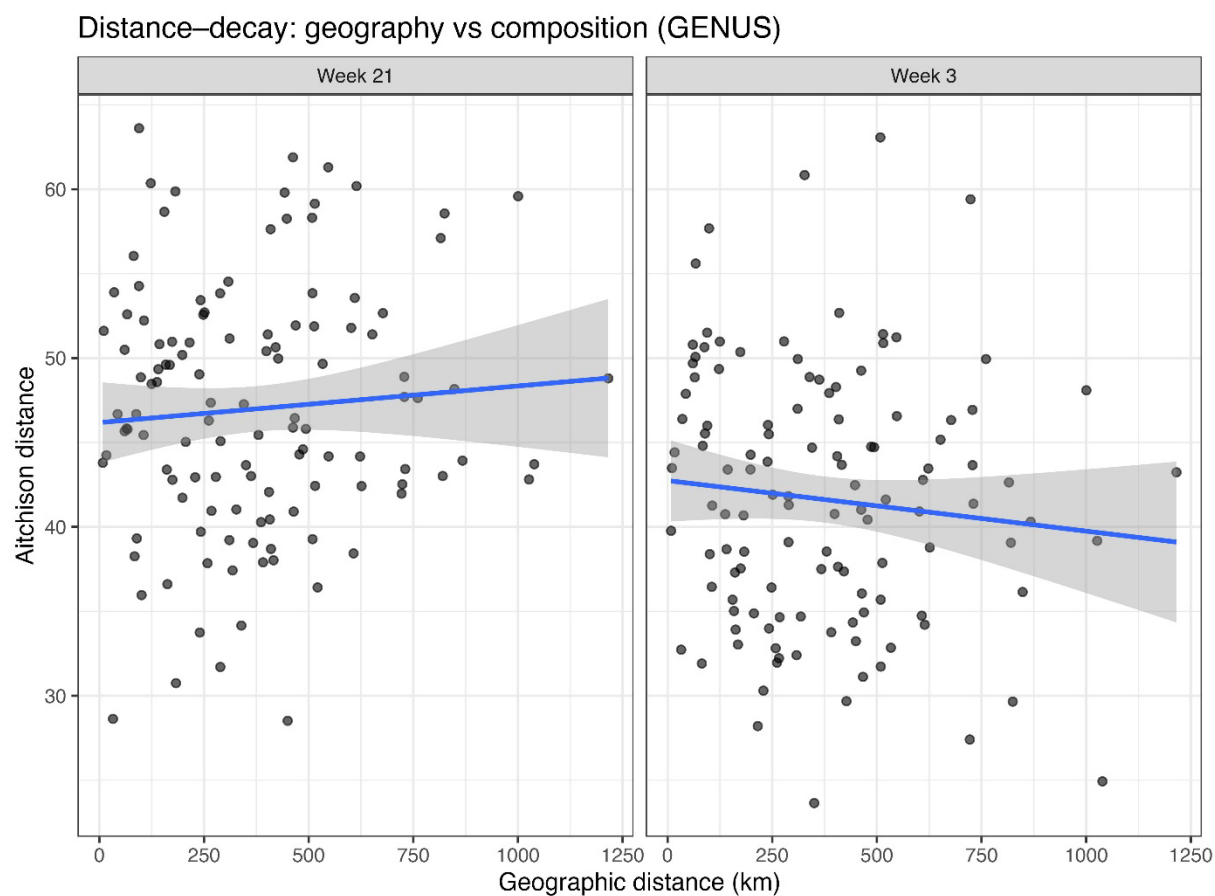

Scatterplots showing the relationship between geographic distance (x-axis) and Aitchison distance (y-axis) among wastewater treatment plants across Sweden at Week 3 (right) and Week 21 (left). Each point represents a pairwise comparison between sites. Shaded areas indicate 95% confidence intervals from linear regression.

Supplementary Figure S2: Stable-core abundance by city.

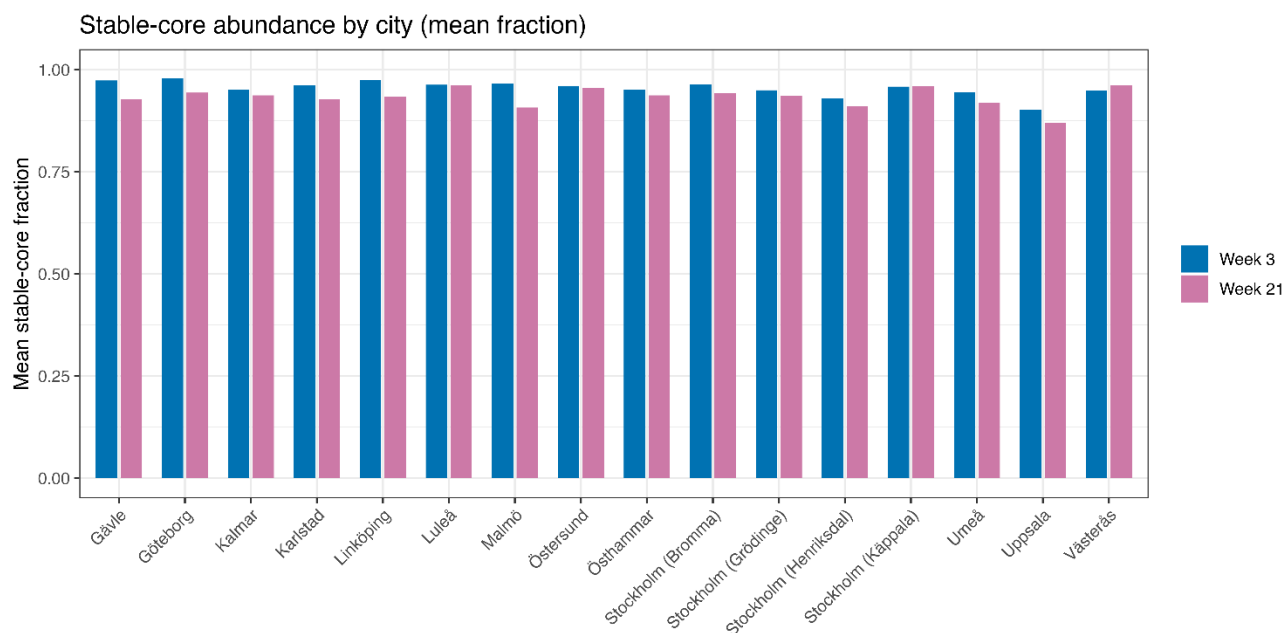

Mean fraction of total abundance explained by the stable core at Week 3 and Week 21 for each city.

Supplementary Table S1: Decomposition of temporal turnover (Week 3 vs. Week 21) into stable-core versus peripheral contributions for each city.

| City                   | Turnover<br>(W21 vs W3,<br>Aitchison) | Stable-core<br>turnover | Peripheral<br>turnover | Stable-core<br>share (%) | Peripheral<br>share (%) |
|------------------------|---------------------------------------|-------------------------|------------------------|--------------------------|-------------------------|
| Kalmar                 | 52.3                                  | 19.8                    | 48.4                   | 14.3                     | 85.7                    |
| Gävle                  | 48.7                                  | 10.5                    | 47.6                   | 4.7                      | 95.3                    |
| Stockholm (Henriksdal) | 48.1                                  | 12.3                    | 46.5                   | 6.6                      | 93.4                    |
| Uppsala                | 46.4                                  | 14.8                    | 44                     | 10.1                     | 89.9                    |
| Östersund              | 45.4                                  | 14.8                    | 42.9                   | 10.7                     | 89.3                    |
| Luleå                  | 45.2                                  | 17.3                    | 41.7                   | 14.7                     | 85.3                    |
| Göteborg               | 41                                    | 11                      | 39.5                   | 7.2                      | 92.8                    |
| Stockholm (Grödinge)   | 38.2                                  | 11.2                    | 36.5                   | 8.6                      | 91.4                    |
| Umeå                   | 36.9                                  | 16.9                    | 32.8                   | 21                       | 79                      |
| Östhammar              | 35.7                                  | 11.3                    | 33.9                   | 10                       | 90                      |
| Västerås               | 35                                    | 10.8                    | 33.3                   | 9.6                      | 90.4                    |
| Linköping              | 34.9                                  | 7.7                     | 34                     | 4.8                      | 95.2                    |
| Stockholm (Käppala)    | 34.6                                  | 13.8                    | 31.7                   | 15.9                     | 84.1                    |
| Malmö                  | 34.2                                  | 12.5                    | 31.8                   | 13.5                     | 86.5                    |
| Karlstad               | 32.7                                  | 11.2                    | 30.8                   | 11.7                     | 88.3                    |
| Stockholm (Bromma)     | 31.6                                  | 4.8                     | 31.2                   | 2.3                      | 97.7                    |
